# Supplementary material for: Hydrogen bonding controlled catalysis of a porous organic framework containing benzimidazole moieties
Source: Royal Society of Chemistry journal article supplement (doi:10.1039/c4nj00053f), 2014-01-01
Supplement: c4nj00053f1.pdf [file c4nj00053f1.pdf]

[Supporting Information]

**Hydrogen bonding controlled catalysis of a porous organic framework containing benzimidazole moieties**

*Bing Liu<sup>a</sup>, Teng Ben<sup>b\*</sup>, Jun Xu,<sup>c</sup> Feng Deng,<sup>c</sup> Shilun Qiu<sup>a\*</sup>*

*<sup>a</sup> State Key Lab of Inorganic Synthesis & Preparative Chemistry, Jilin University, 130012, China. E-mail: sqiu@jlu.edu.cn; Fax: +(86) 431 85168331; Tel: +(86) 431 85168331*

*<sup>b</sup> Department of Chemistry, Jilin University, 130012, China. E-mail: tben@jlu.edu.cn*

*<sup>c</sup> Wuhan Institute of Physics and Mathematics - State Key Laboratory of Magnetic Resonance and Atomic and Molecular Physics, Wuhan, China*

*\*To whom correspondence should be addressed.*

## Table of Contents

|                                                                  |           |
|------------------------------------------------------------------|-----------|
| <b>1. Instruments and Methods</b>                                | <b>S3</b> |
| <b>2. Investigation of Structure of JUC-Z12</b>                  |           |
| 2-1. TGA Experiment                                              | S6        |
| 2-2. FT-IR of JUC-Z12                                            | S7        |
| 2-3. PXRD of JUC-Z12                                             | S8        |
| 2-4. SEM of JUC-Z12                                              | S9        |
| 2-5. EDS of JUC-Z12                                              | S10       |
| 2-6. $^{13}\text{C}$ CP-MAS NMR of JUC-Z12                       | S11       |
| <b>3. Gas Storage</b>                                            |           |
| 3-1. Investigation of Adsorption of $\text{N}_2$ (77 K)          | S12       |
| 3-2. Investigation of Adsorption of $\text{H}_2$ (77 K, 87 K)    | S14       |
| 3-3. Investigation of Adsorption of $\text{CH}_4$ (273 K, 298 K) | S15       |
| 3-4. Investigation of Adsorption of $\text{CO}_2$ (273 K, 298 K) | S16       |
| <b>4. Catalytic reactions with JUC-Z12</b>                       |           |
| 4-1. $^1\text{H}$ -NMR of 4-methylbenzaldehyde                   | S17       |
| 4-2. $^1\text{H}$ -NMR of benzaldehyde                           | S18       |
| 4-3. $^1\text{H}$ -NMR of 4-bromobenzaldehyde                    | S19       |
| 4-4. $^1\text{H}$ -NMR of 4-chlorobenzaldehyde                   | S20       |
| 4-5. $^1\text{H}$ -NMR of 4-methoxybenzaldehyde                  | S21       |
| 4-6. $^1\text{H}$ -NMR of 4-hydroxybenzaldehyde                  | S22       |

## **1. Instruments and Methods**

### ***1-1. TGA Experiment.***

The thermogravimetric analysis (TGA) was performed using a SHIMADZU DTG-60 thermal analyzer system at the heating rate of  $10\text{ }^{\circ}\text{C min}^{-1}$  to  $800\text{ }^{\circ}\text{C}$  in the dried air atmosphere and the air flow rate was  $30\text{ mL min}^{-1}$ . The sample was loaded in alumina pan.

### ***1-2. FT-IR Experiment.***

The FTIR spectra (KBr, Aldrich) were measured using a BRUKER VERTEX 80V Fourier transform infrared spectrometer. Samples were packed firmly to get transparent films. Measurements were carried out under vacuum to decrease the interference of moisture.

### ***1-3. Elemental Analysis.***

Elemental analysis was performed using an Elementar Vario EL cube.

### ***1-4. PXRD Experiment.***

PXRD measurements were performed using a SHIMADZU XRD-6000 X-ray diffractometer using Cu-K $\alpha$  radiation, 40 kV, 30 mA with a scanning rate of  $0.15^{\circ}\text{ min}^{-1}$  ( $2\theta$ ).

### ***1-5. SEM and EDS analysis.***

The sample was prepared by dispersing the material onto a sticky carbon surface attached to a flat aluminum sample holder. Scanning electron microscopy (SEM) was performed on an FEI Quanta 400 Thermal FE Environment Scanning Electron Microscope and energy dispersive spectrometer (EDS) analysis was performed on a JEOS JSM 6700.

***1-6.  $^1\text{H}$  NMR and  $^{13}\text{C}$  CP-MAS NMR analysis.***

We use a BRUKER NMR (400 MHz) to perform  $^1\text{H}$  NMR of products of catalytic reaction. Solid state NMR spectroscopy experiment was carried out at 9.4 T with a Varian Infinity plus-400 spectrometer, equipped with a Chemagnetic triple-resonance 7.5 mm probe, with resonance frequencies of 100.6 and 161.9 MHz for  $^{13}\text{C}$ . The MAS rate was set to 3–5 kHz. For the  $^1\text{H}$ - $^{13}\text{C}$  cross-polarization (CP)/MAS NMR experiments, the Hartmann–Hahn condition was achieved using hexamethylbenzene (HMB), with a contact time of 2.0 ms and a repetition time of 2.0 s.

***1-7. Low-pressure  $\text{N}_2$  Sorption measurements.***

Nitrogen sorption experiments were performed at 77 K up to 1 bar using a Micro Meritics Tristar II 3020 surface area and pore size analyzer. Before sorption analysis, the sample was evacuated at 150 °C for 10 h using a turbo molecular vacuum pump. Specific surface areas were calculated from nitrogen adsorption data by multipoint BET

analysis. Pore size distributions were calculated from the N<sub>2</sub> adsorption isotherms using non-local density functional theory (NLDFT) method.

#### ***1-8. Low-pressure H<sub>2</sub>, CO<sub>2</sub> and CH<sub>4</sub> Sorption measurements.***

Low-pressure H<sub>2</sub>, CO<sub>2</sub> and CH<sub>4</sub> sorption was measured using a Micro Meritics Tristar II 3020 surface area and pore size analyzer. Ultra-high-purity grade H<sub>2</sub>, CO<sub>2</sub> (99.999%) and CH<sub>4</sub> gases (99.99%) were used for all adsorption measurements. Free space was measured using helium (99.999%), assuming that the helium is not adsorbed at any of the studied temperatures. H<sub>2</sub> isotherms at 77 K were measured in a liquid nitrogen bath, H<sub>2</sub> isotherms at 87 K were measured in the liquid argon bath, CO<sub>2</sub> and CH<sub>4</sub> isotherms at 273 K were measured in an ice-water bath. To provide high accuracy and precision on determining the relative pressure ( $P/P_0$ ), the vapor pressure for each data point was monitored throughout the gas sorption analyses.

#### ***1-9. HPLC analysis***

To analyze the conversion of substrate, part of the mixture was filtered out and the filtration was prepared to be solution for test. Here we use a SHIMADZU LC-10 HPLC with wave length 254 nm.

## 2. Investigation of Structure of JUC-Z12

### 2-1. TGA Experiment

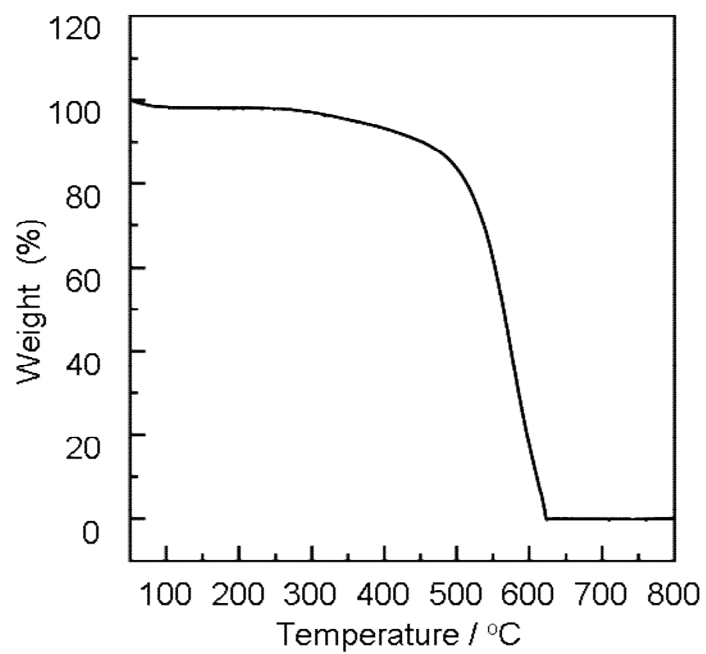

**Fig. S1** TGA plot of JUC-Z12 under dry air with the rate of 10 °C min<sup>-1</sup>.

## 2-2. FT-IR of JUC-Z12

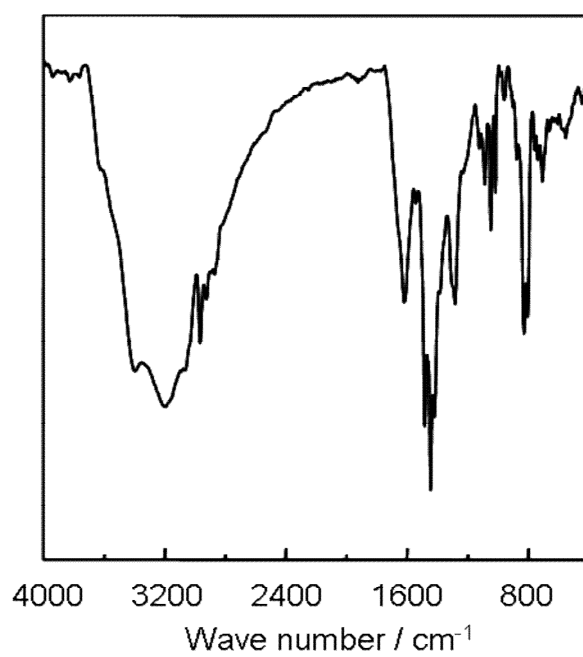

**Fig. S2** FT-IR spectra of JUC-Z12.

**2-3. PXRD of JUC-Z12**

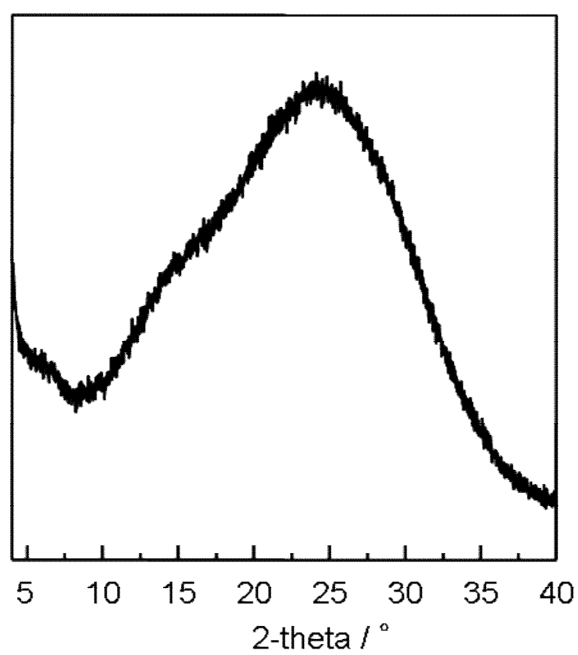

**Fig. S3** PXRD pattern of JUC-Z12.



**2-4. SEM of JUC-Z12**

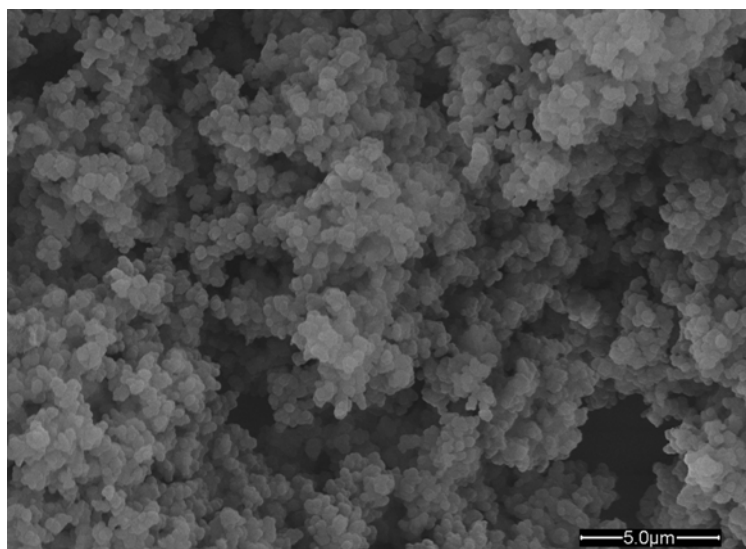

**Fig. S4** SEM image of JUC-Z12.

## 2-5. EDS of JUC-Z12

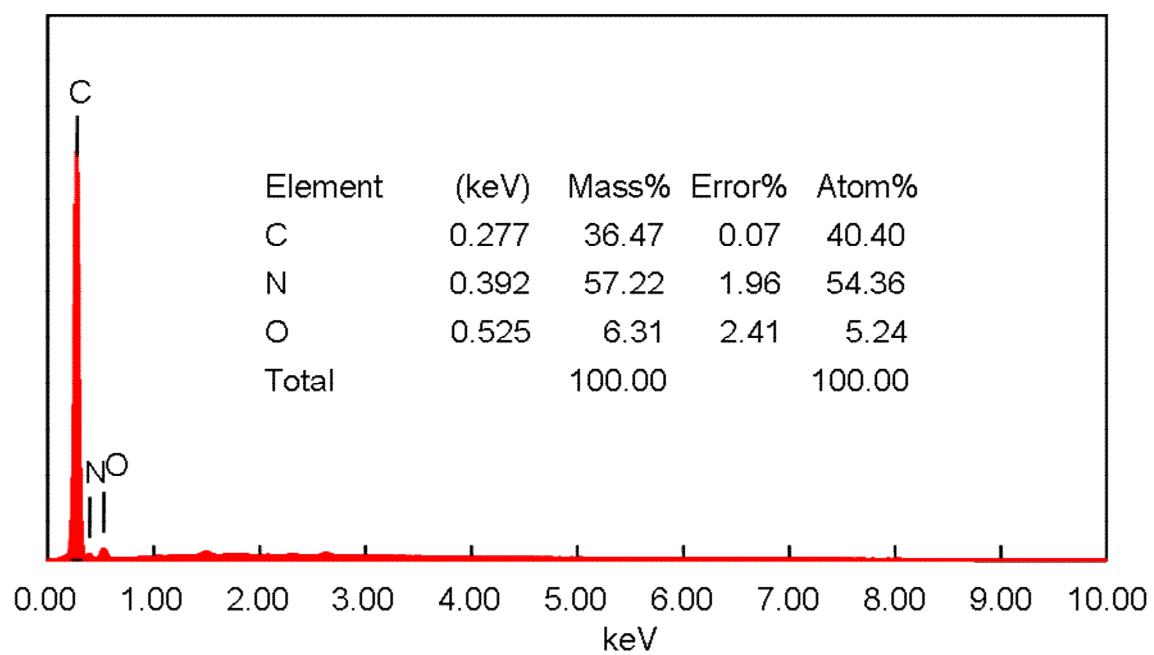

**Fig. S5** EDS result of JUC-Z12.

2-6.  $^{13}\text{C}$  CP-MAS NMR of JUC-Z12

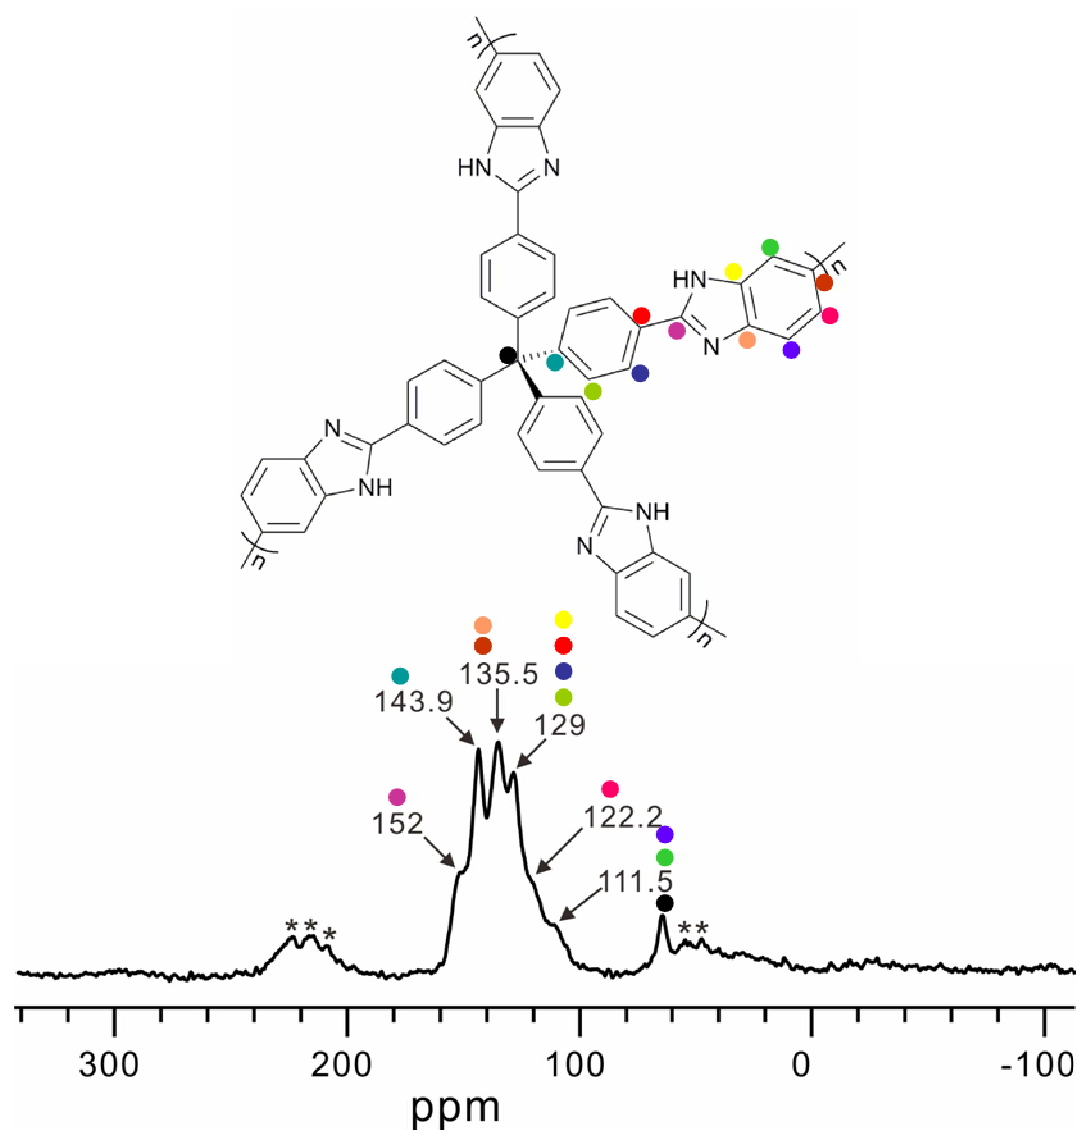

**Fig. S6**  $^{13}\text{C}$  CP-MAS NMR spectrum of JUC-Z12.

### 3. Gas Storage

#### 3-1. Investigation of Adsorption of $N_2$ (77K)

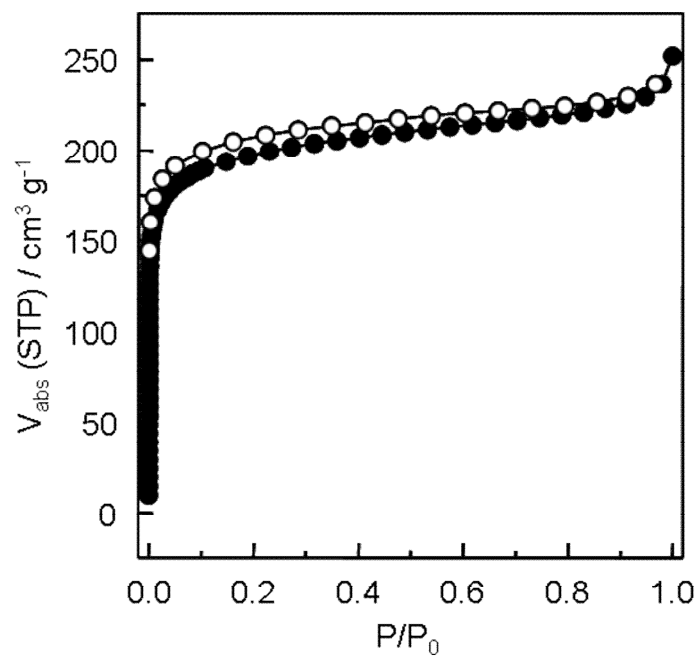

**Fig. S7** 77 K,  $N_2$  sorption isotherms of JUC-Z12 (solid symbols: adsorption; open symbols: desorption).

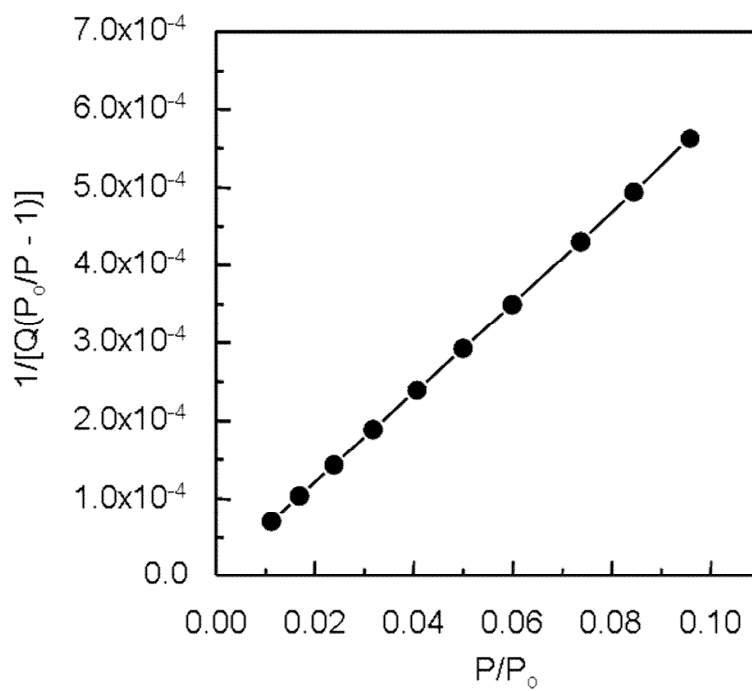

**Fig. S8** BET plot derived from  $N_2$  adsorption ( $R^2 = 0.999934$ ,  $S_{BET} = 750 \text{ m}^2 \text{ g}^{-1}$ ).

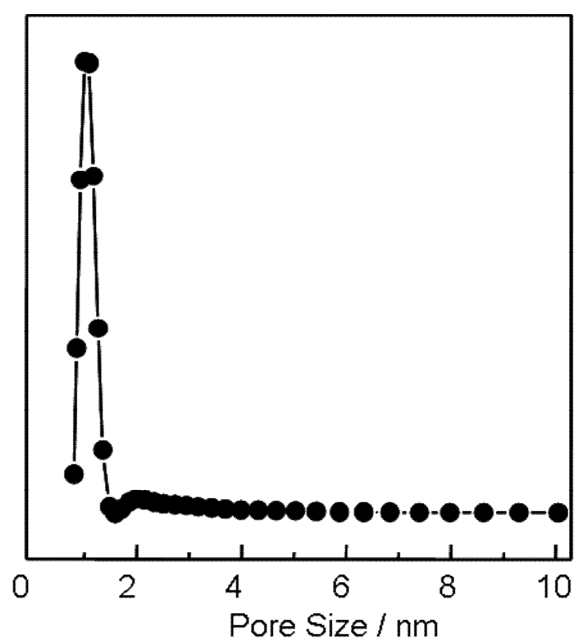

**Fig. S9** Pore size distributions derived from N<sub>2</sub> adsorption by DFT.

### 3-2. Investigation of Adsorption of $H_2$ (77 K, 87 K)

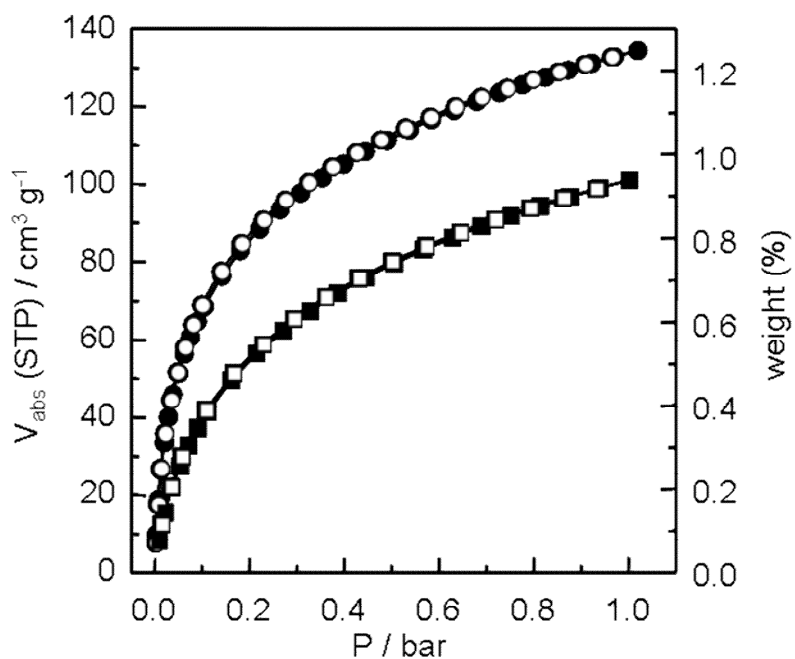

**Fig. S10**  $H_2$  adsorption (solid symbols) and desorption (open symbols) isotherms of JUC-Z12 at 77 K (cycle) and 87 K (square).

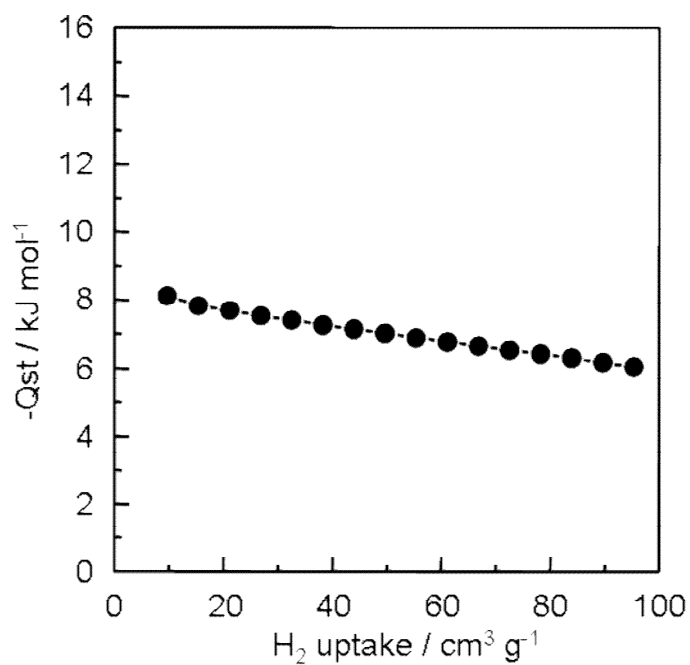

**Fig. S11**  $Q_{\text{st},H_2}$  of JUC-Z12 as a function of the amount of  $H_2$  adsorbed.

### 3-3. Investigation of Adsorption of $\text{CH}_4$ (273 K, 298 K)

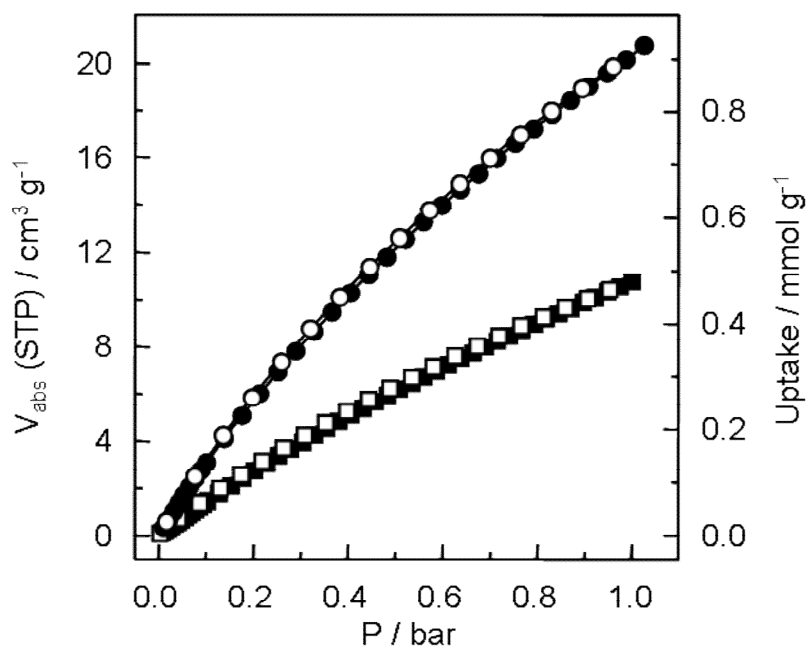

**Fig. S12**  $\text{CH}_4$  adsorption (solid symbols) and desorption (open symbols) isotherms of JUC-Z12 at 273 K (cycle) and 298 K (square).

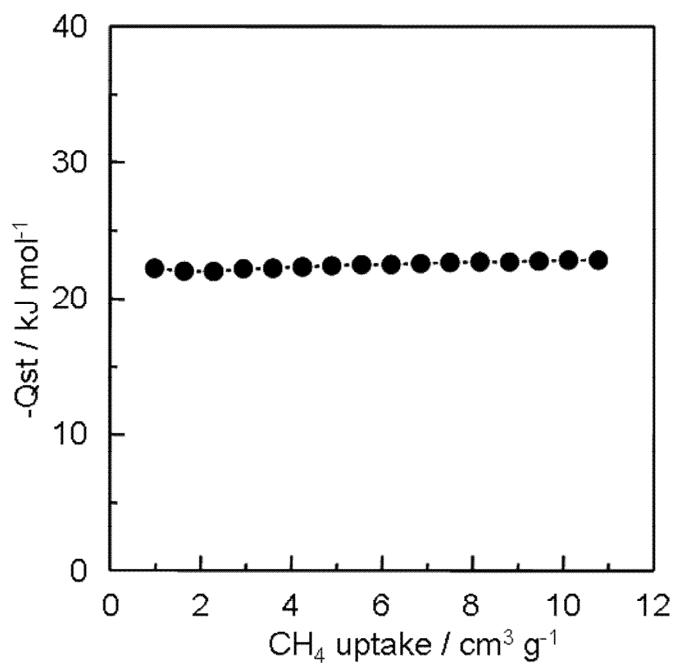

**Fig. S13**  $Q_{\text{stCH}_4}$  of JUC-Z12 as a function of the amount of  $\text{CH}_4$  adsorbed.

### 3-4. Investigation of Adsorption of CO<sub>2</sub> (273 K, 298 K)

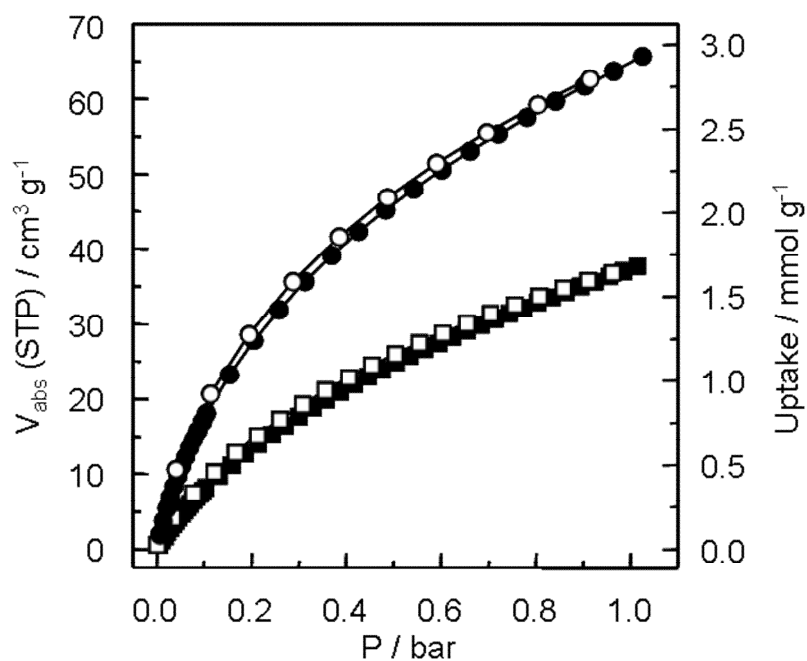

**Fig. S14** CO<sub>2</sub> adsorption (solid symbols) and desorption (open symbols) isotherms of JUC-Z12 at 273 K (cycle) and 298 K (square).

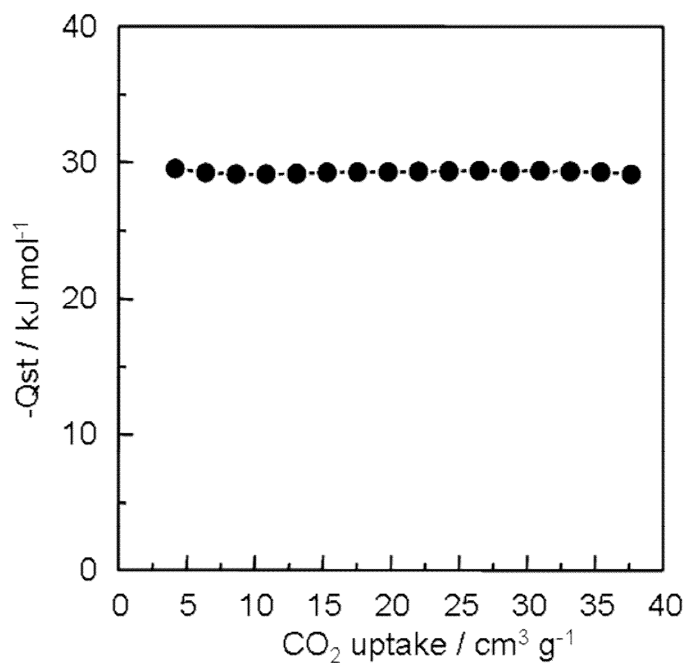

**Fig. S15**  $Q_{\text{stCO}_2}$  of JUC-Z12 as a function of the amount of CO<sub>2</sub> adsorbed.



#### 4. Catalytic reactions with JUC-Z12

##### 4-1. $^1\text{H}$ -NMR of 4-methylbenzaldehyde and 2-(4-methylbenzylidene)malononitrile

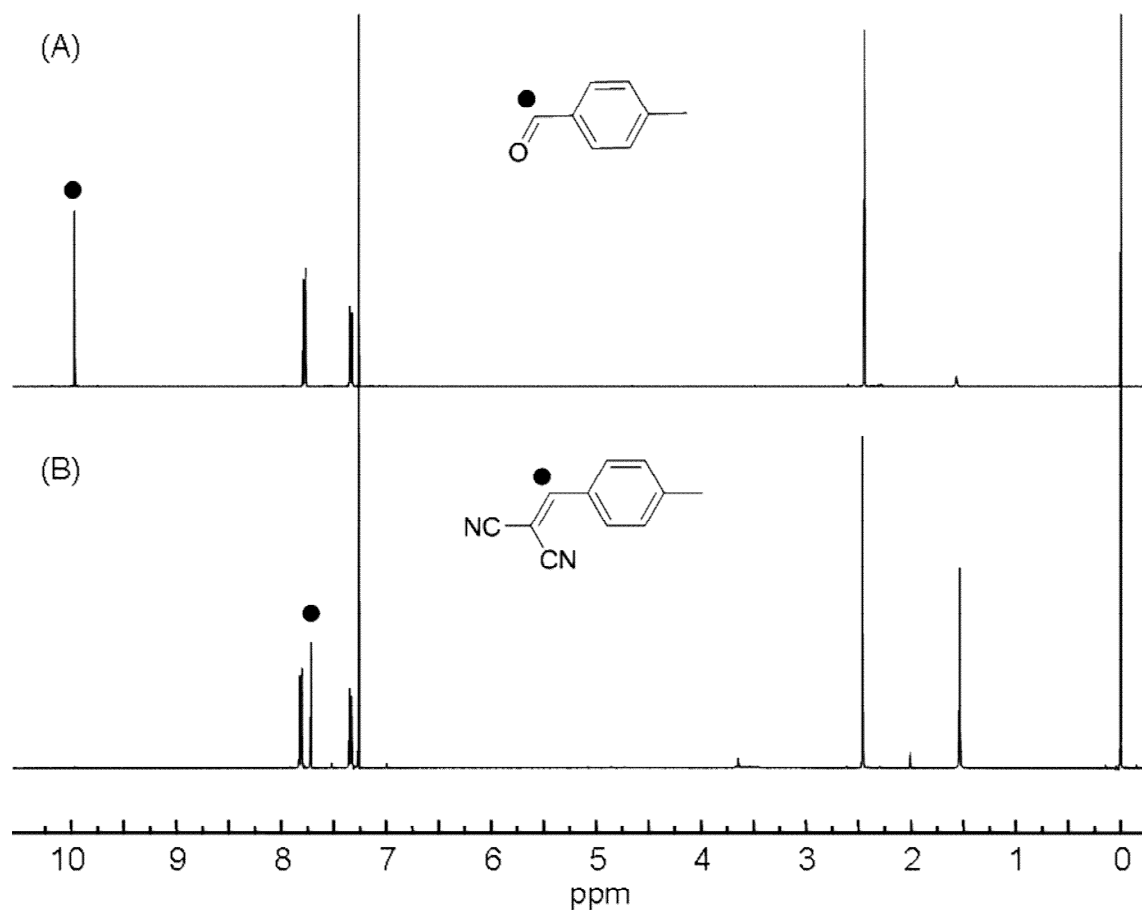

**Fig. S16**  $^1\text{H}$  NMR spectrum of (A) 4-methylbenzaldehyde and (B) 2-(4-methylbenzylidene)malononitrile in  $\text{CDCl}_3$ .

4-2.  $^1\text{H}$ -NMR of benzaldehyde and 2-benzylidenemalononitrile

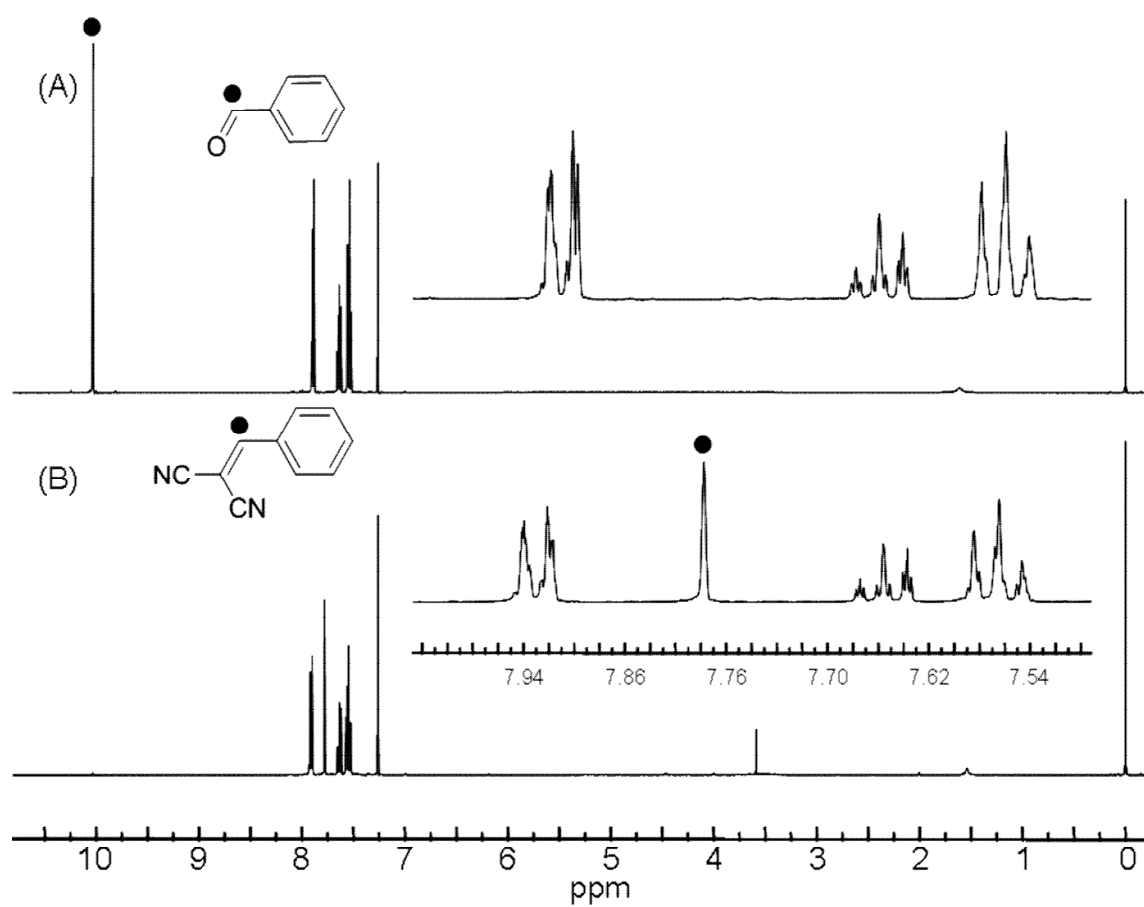

**Fig. S17**  $^1\text{H}$  NMR spectrum of (A) benzaldehyde and (B) 2-benzylidenemalononitrile in  $\text{CDCl}_3$ .

4-3.  $^1\text{H}$ -NMR of 4-bromobenzaldehyde and 2-(4-bromobenzylidene)malononitrile

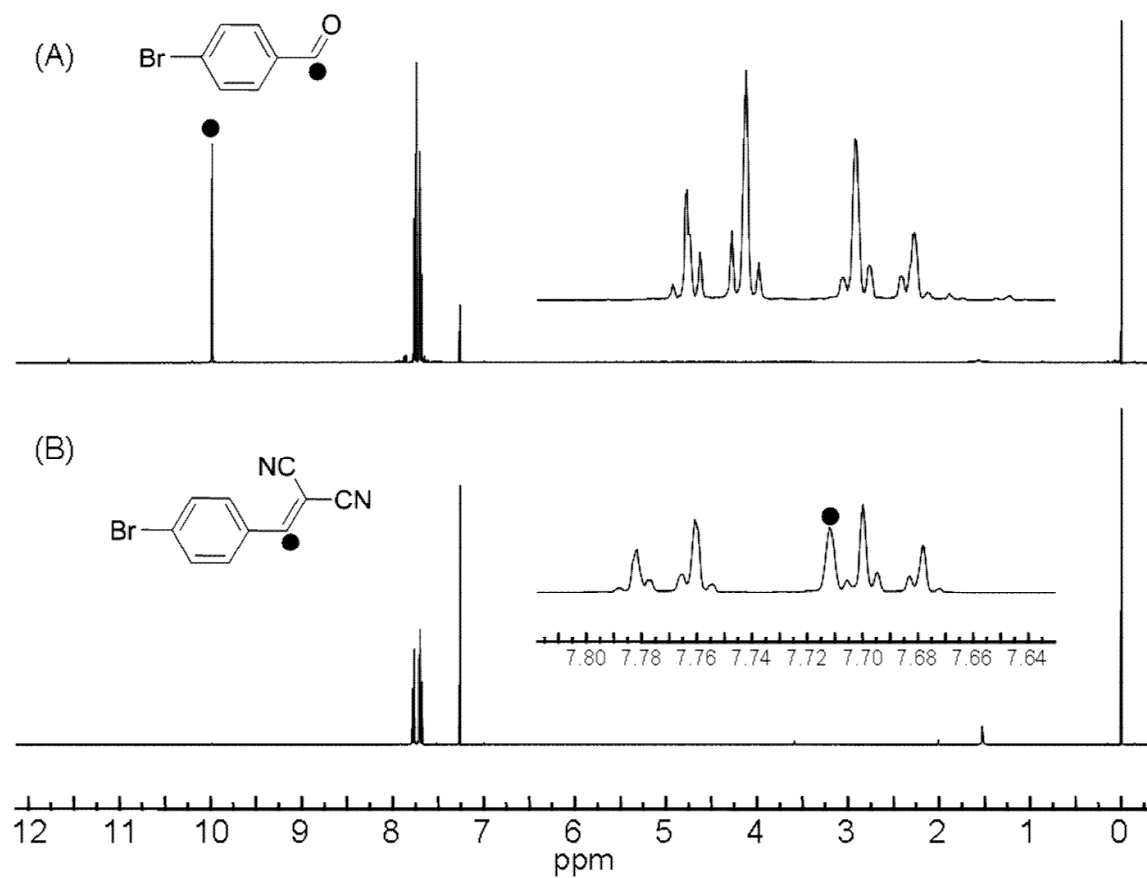

**Fig. S18**  $^1\text{H}$  NMR spectrum of (A) 4-bromobenzaldehyde and (B) 2-(4-bromobenzylidene)malononitrile in  $\text{CDCl}_3$ .

**4-4.  $^1\text{H}$ -NMR of 4-chlorobenzaldehyde and 2-(4-chlorobenzylidene)malononitrile**

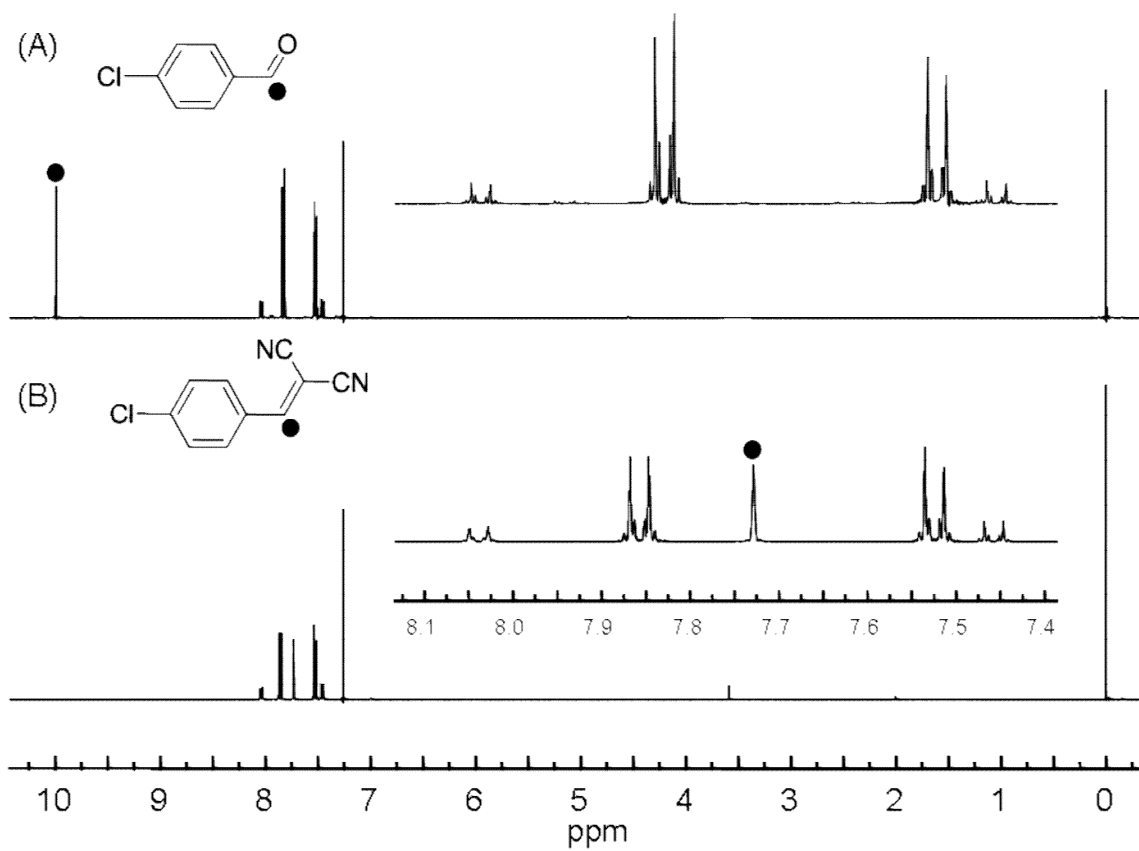

**Fig. S19**  $^1\text{H}$  NMR spectrum of (A) 4-chlorobenzaldehyde and (B) 2-(4-chlorobenzylidene)malononitrile in  $\text{CDCl}_3$ .

4-5.  $^1\text{H}$ -NMR of 4-methoxybenzaldehyde and 2-(4-methoxybenzylidene)malononitrile

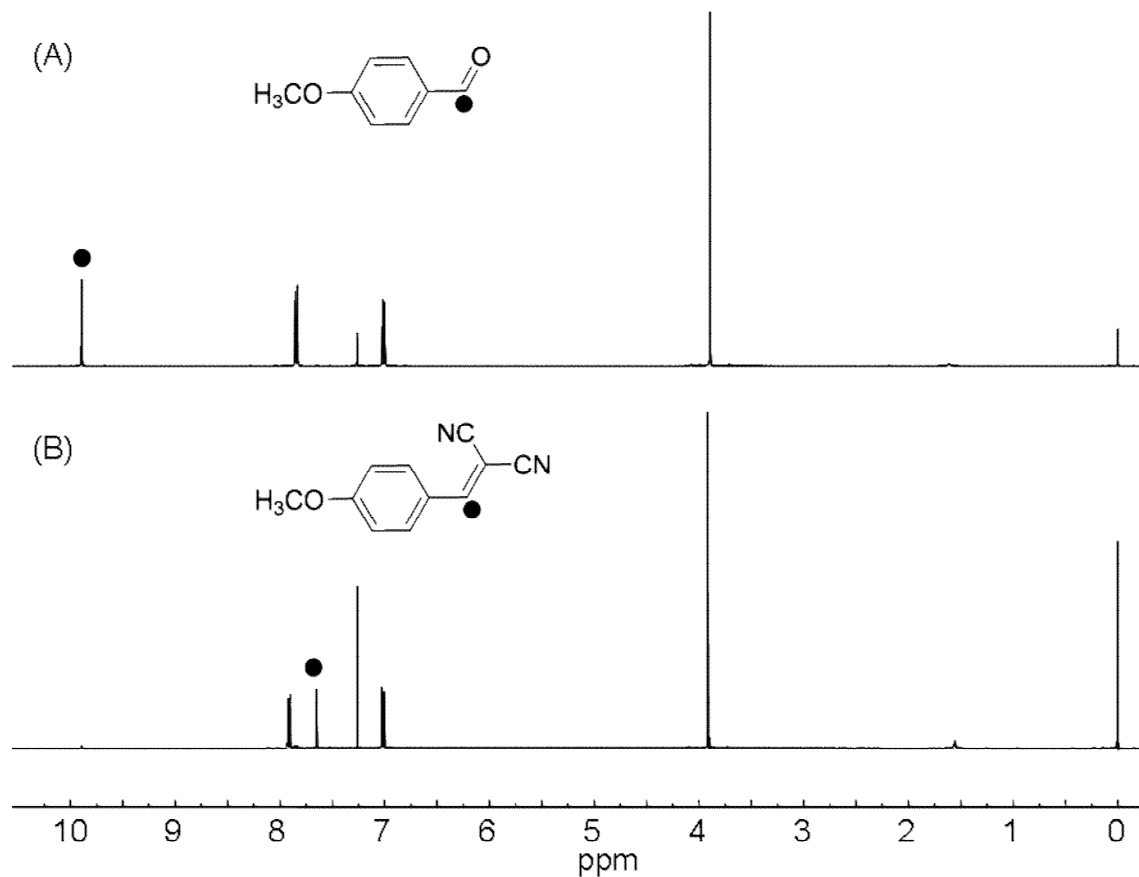

**Fig. S20**  $^1\text{H}$  NMR spectrum of (A) 4-methoxybenzaldehyde and (B) 2-(4-methoxybenzylidene)malononitrile in  $\text{CDCl}_3$ .

4-6.  $^1\text{H}$ -NMR of 4-hydroxybenzaldehyde and 2-(4-hydroxybenzylidene)malononitrile

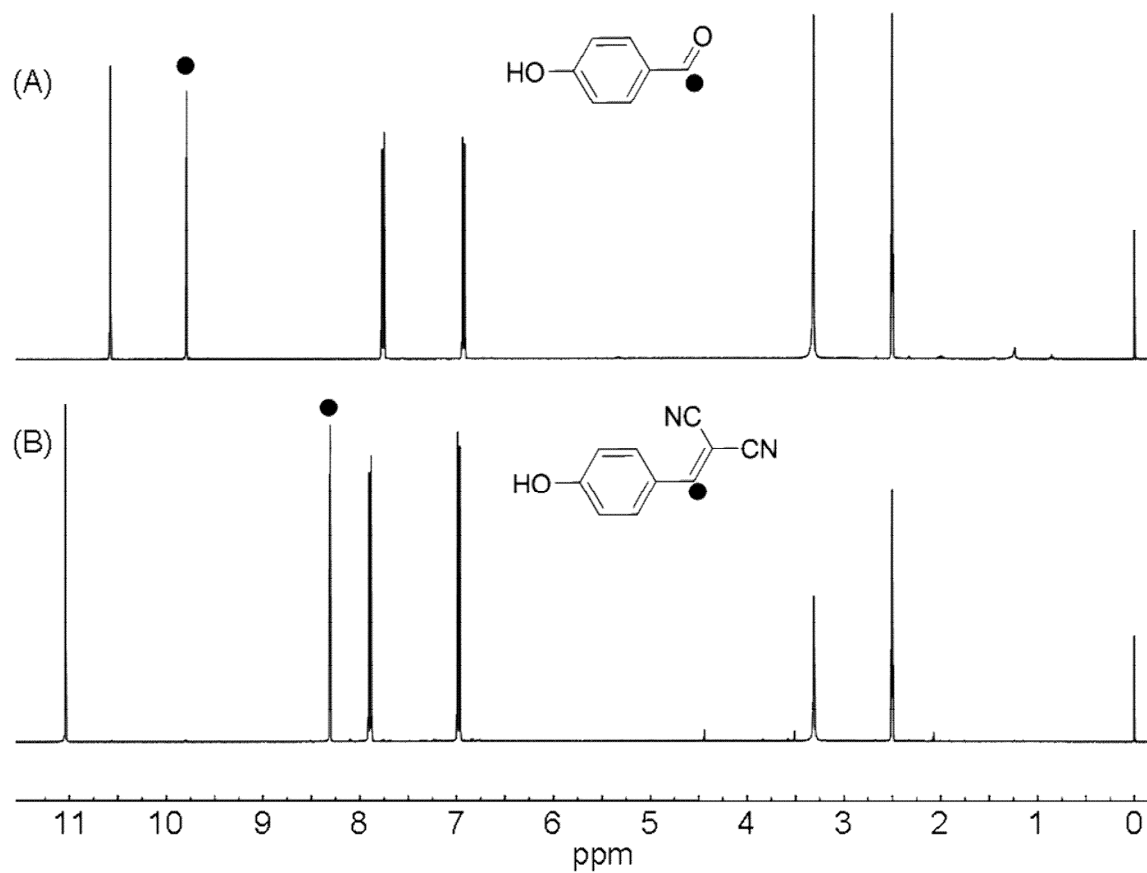

**Fig. S21**  $^1\text{H}$  NMR spectrum of (A) 4-hydroxybenzaldehyde and (B) 2-(4-hydroxybenzylidene)malononitrile in  $\text{d}_6$ -DMSO.
